# Supplementary material for: Variations in Key Aroma Compounds and Aroma Profiles in Yellow and White Cultivars of Flammulina filiformis Based on Gas Chromatography–Mass Spectrometry–Olfactometry, Aroma Recombination, and Omission Experiments Coupled with Odor Threshold Concentrations
Source: MDPI journal article supplement (doi:10.3390/foods13050684), 2024-02-23
Supplement: s1 [file s1]

## Supplementary data

### Table captions:

**Table S1.** Three Samples of *F. filiformis*

**Table S2.** Chemical Standards

**Table S3.** Highest presented aroma compound concentrations for OT determination

**Table S4.** Standard Curves for Aroma-Active Compounds in *F. filiformis*

**Table S5.** Supplementary information of Aroma-Active Compounds in *F. filiformis*.

**Table S1.** Three samples of *F. filiformis*

| Strain   | Name | Number of shoots | Single bottle yield/g | Stem length/cm | Stem diameter/mm | Cap diameter/mm |
|----------|------|------------------|-----------------------|----------------|------------------|-----------------|
| No.61524 | F1   | 348              | 267.32                | 13.22          | 3.66             | 7.29            |
| No.61532 | F2   | 674              | 354.00                | 17.96          | 3.18             | 8.52            |
| No.61490 | F3   | 965              | 468.18                | 17.35          | 3.56             | 8.38            |

**Table S2.** Chemical Standards

| Boer (Shanghai, China)  |        | Adamas (Shanghai, China)    |        | Sigma-Aldrich (Shanghai, China)       |    | Sinopharm (Shanghai, China) |    |
|-------------------------|--------|-----------------------------|--------|---------------------------------------|----|-----------------------------|----|
| butyl 3-methylbutanoate | 97%+   | hexyl methanoate            | >98.0% | acetone                               | AR | dichloromethane             | AR |
| 3,7-dimethyl-1-octanol  | 98%    | octanal                     | 98%    | 1,2-dichlorobenzene                   | AR | anhydrous sodium sulfate    | AR |
| 1-penten-3-ol           | 98%    | methyl benzyl alcohol       | ≥98%   | C7-C30 n-alkanes (solvent:<br>hexane) | AR | sodium chloride             | AR |
| 1-octen-3-ol            | 98%    | δ-dodecalactone             | 99%    |                                       |    |                             |    |
| ethyl 3-hexenoate       | 98%    | butyl pentanoate            | 98%    |                                       |    |                             |    |
| ethyl acetate           | 99.7%+ | 3-octanol                   | >98%   |                                       |    |                             |    |
| decanol                 | 99.5%  | dodecanoic acid             | 99%    |                                       |    |                             |    |
| 3-octanone              | 98%    | octanoic acid               | 99%    |                                       |    |                             |    |
| ethyl butyrate          | 99.5%  | dodecyl acetate             | 95%    |                                       |    |                             |    |
| terpineol               | 98%+   | dodecanol                   | >99%   |                                       |    |                             |    |
|                         |        | decyl acetate               | ≥99%   |                                       |    |                             |    |
|                         |        | nonanoic acid               | ≥98%   |                                       |    |                             |    |
|                         |        | octyl acetate               | 93%    |                                       |    |                             |    |
|                         |        | decenone                    | ≥98%   |                                       |    |                             |    |
|                         |        | isopentyl 3-methylbutanoate | >97%   |                                       |    |                             |    |

|                         |      |
|-------------------------|------|
| 3-hydroxy-2-butanone    | 98%  |
| 3-methylbutyl octanoate | ≥95% |
| 2-penten-1-ol           | ≥95% |

**Table S3.** Highest presented aroma compound concentrations for OT determination

| No. | Compounds              | maximum concentration<br>(mg/kg) |
|-----|------------------------|----------------------------------|
| A2  | dodecanoic acid        | 270                              |
| A4  | nonanoic acid          | 124                              |
| B9  | methyl benzyl alcohol  | 13                               |
| B10 | decanol                | 21                               |
| B11 | 3-octanol              | 2                                |
| B12 | 1-penten-3-ol          | 10                               |
| B13 | 1-octen-3-ol           | 1                                |
| B14 | terpineol              | 32                               |
| B2  | dodecanol              | 67                               |
| B8  | 3,7-dimethyl-1-octanol | 0.004                            |
| D2  | 3-octanone             | 1                                |
| D4  | decenone               | 249                              |
| E1  | ethyl butyrate         | 0.2                              |
| E7  | hexyl methanoate       | 598                              |
| E8  | octyl acetate          | 1                                |
| E10 | dodecyl acetate        | 134                              |
| E11 | decyl acetate          | 6                                |

|     |                         |     |
|-----|-------------------------|-----|
| E12 | ethyl acetate           | 0.1 |
| E2  | butyl 3-methylbutanoate | 2   |
| E3  | ethyl 3-hexenoate       | 242 |
| E5  | butyl pentanoate        | 314 |

**Table S4.** Standard Curves for Aroma-Active Compounds in *F. filiformis*

| No. | compounds              | Standard curve     | R <sup>2</sup> | LOD<br>( $\mu\text{g/kg}$ ) | LOQ<br>( $\mu\text{g/kg}$ ) |
|-----|------------------------|--------------------|----------------|-----------------------------|-----------------------------|
| A2  | dodecanoic acid        | $y=0.9133x+0.1042$ | 0.9505         | 0.0055                      | 0.0182                      |
| A3  | octanoic acid          | $y=1.8108x+0.1237$ | 0.9535         | 0.0084                      | 0.0280                      |
| A4  | nonanoic acid          | $y=0.4687x+0.3528$ | 0.9374         | 0.0195                      | 0.0648                      |
| B9  | methyl benzyl alcohol  | $y=0.7178x+0.0612$ | 0.9891         | 0.0588                      | 0.1960                      |
| B10 | decanol                | $y=1.1604x+0.1086$ | 0.9441         | 0.0230                      | 0.0767                      |
| B11 | 3-octanol              | $y=0.4477x+0.0684$ | 0.9830         | 0.0059                      | 0.0198                      |
| B12 | 1-penten-3-ol          | $y=0.1936x+0.0362$ | 0.9703         | 0.0344                      | 0.1146                      |
| B13 | 1-octen-3-ol           | $y=0.3245x+0.1569$ | 0.9865         | 0.0243                      | 0.0808                      |
| B14 | terpineol              | $y=1.2673x+0.2444$ | 0.9379         | 0.0080                      | 0.0268                      |
| B2  | dodecanol              | $y=0.6596x+0.0426$ | 0.9999         | 0.0314                      | 0.1048                      |
| B18 | 2-penten-1-ol          | $y=0.0098x+0.0104$ | 0.9988         | 0.0048                      | 0.0158                      |
| B8  | 3,7-dimethyl-1-octanol | $y=1.1345x+0.8208$ | 0.9273         | 0.0070                      | 0.0235                      |
| C3  | octanal                | $y=1.9613x-0.0197$ | 0.9994         | 0.3072                      | 1.0240                      |
| D1  | 3-hydroxy-2-butanone   | $y=0.0089x+0.0306$ | 0.9744         | 0.0137                      | 0.0456                      |
| D2  | 3-octanone             | $y=0.2662x+0.5175$ | 0.9253         | 0.0032                      | 0.0106                      |
| D4  | decenone               | $y=0.4744x+0.1512$ | 0.9834         | 0.0037                      | 0.0123                      |

|     |                             |                    |        |        |        |
|-----|-----------------------------|--------------------|--------|--------|--------|
| D5  | $\delta$ -dodecalactone     | $y=0.1609x+0.0320$ | 0.9690 | 0.0616 | 0.2054 |
| E1  | ethyl butyrate              | $y=0.1737x+0.0041$ | 0.9726 | 0.0039 | 0.0130 |
| E7  | hexyl methanoate            | $y=0.2441x+0.0560$ | 0.9551 | 0.0370 | 0.1233 |
| E8  | octyl acetate               | $y=0.3019x+0.1161$ | 0.9541 | 0.0067 | 0.0222 |
| E9  | 3-methylbutyl octanoate     | $y=0.0370x+0.2612$ | 0.9494 | 0.0395 | 0.1315 |
| E10 | dodecyl acetate             | $y=1.4696x-0.2433$ | 0.9812 | 0.0690 | 0.2299 |
| E11 | decyl acetate               | $y=0.3015x+0.1037$ | 0.9753 | 0.0109 | 0.0364 |
| E12 | ethyl acetate               | $y=0.6899x+0.1951$ | 0.9715 | 0.0044 | 0.0146 |
| E2  | butyl 3-methylbutanoate     | $y=0.5450x+0.1478$ | 0.9611 | 0.0076 | 0.0252 |
| E3  | ethyl 3-hexenoate           | $y=0.3629x+0.0229$ | 0.9848 | 0.0340 | 0.1132 |
| E4  | isopentyl 3-methylbutanoate | $y=0.9009x-0.0497$ | 0.9983 | 0.0233 | 0.0778 |
| E5  | butyl pentanoate            | $y=2.2070x+0.0601$ | 0.9913 | 0.0508 | 0.1694 |

**Table S5.** Supplementary information of Aroma-Active Compounds in *F. filiformis*

| no.      |    | name               | chemical formula | Molecular mass | Quantification Ions |
|----------|----|--------------------|------------------|----------------|---------------------|
| acids    | A1 | isobutyric acid    | C4H8O2           | 88.10512       | 43,41               |
|          | A2 | dodecanoic acid    | C12H24O2         | 200.31776      | 43,60,73            |
|          | A3 | octanoic acid      | C8H16O2          | 144.21144      | 60,73               |
|          | A4 | nonanoic acid      | C9H18O2          | 158.23802      | 57,60,73            |
| alcohols | B1 | 3-methyl-1-butanol | C5H12O           | 88.15          | 55,42,43            |
|          | B2 | dodecanol          | C12H26O          | 186.339        | 43,55,69            |
|          | B3 | 2-ethyl-1-hexanol  | C8H18O           | 130.231        | 57                  |
|          | B4 | 2-heptanol         | C7H16O           | 116.2          | 45                  |
|          | B5 | 2-octanol          | C8H18O           | 130.23         | 45                  |
|          | B6 | 2-nonanol          | C9H20O           | 144.258        | 45                  |

|           |     |                             |          |           |           |
|-----------|-----|-----------------------------|----------|-----------|-----------|
|           | B7  | hexadecanol                 | C16H34O  | 242.447   | 55,69     |
|           | B8  | 3,7-dimethyl-1-octanol      | C10H22O  | 158.28100 | 41,55,56  |
|           | B9  | methyl benzyl alcohol       | C8H10O   | 122.1644  | 77,79,107 |
|           | B10 | decanol                     | C10H22O  | 158.285   | 55,70     |
|           | B11 | 3-octanol                   | C8H18O   | 130.23    | 55,59,83  |
|           | B12 | 1-penten-3-ol               | C5H10O   | 86.13230  | 57        |
|           | B13 | 1-octen-3-ol                | C8H16O   | 128.21    | 43,57     |
|           | B14 | terpineol                   | C10H18O  | 154.24900 | 59,93,121 |
|           | B15 | 2-pentanol                  | C5H12O   | 88.14818  | 45        |
|           | B16 | 2,4-decadien-1-ol           | C10H18O  | 154.24900 | 41        |
|           | B17 | 1-octanol                   | C8H18O   | 130.22792 | 55,56     |
|           | B18 | 2-penten-1-ol               | C5H10O   | 86.134    | 57        |
| aldehydes | C1  | 2-dodecenal                 | C12H22O  | 182.30200 | 41,43     |
|           | C2  | 3,7-dimethyl-2,6-octadienal | C10H16O  | 152.237   | 41,69     |
|           | C3  | octanal                     | C8H16O   | 128.215   | 43,44     |
|           | C4  | nonanal                     | C9H18O   | 142.23862 | 57,41,43  |
|           | C5  | 2-undecenal                 | C11H20O  | 168.28    | 41,70     |
|           | C6  | 2-nonenal                   | C9H16O   | 140.22    | 41,43     |
|           | C7  | 4-decenal                   | C10H18O  | 154.253   | 41        |
| ketones   | D1  | 3-hydroxy-2-butanone        | C4H8O2   | 88.10512  | 43,45     |
|           | D2  | 3-octanone                  | C8H16O   | 128.215   | 43,57,72  |
|           | D3  | 1-hepten-3-one              | C7H12O   | 112.172   | 55,70,27  |
|           | D4  | decenone                    | C10H18O  | 154.253   | 43,55     |
|           | D5  | $\delta$ -dodecalactone     | C12H22O2 | 198.306   | 99        |
| esters    | E1  | ethyl butyrate              | C6H12O2  | 116.15828 | 43,71     |
|           | E2  | butyl 3-methylbutanoate     | C9H18O2  | 158.23802 | 56,57,85  |

|        |     |                             |          |           |          |
|--------|-----|-----------------------------|----------|-----------|----------|
|        | E3  | ethyl 3-hexenoate           | C8H14O2  | 142.198   | 29,41,69 |
|        | E4  | isopentyl 3-methylbutanoate | C10H20O2 | 172.2646  | 43,70,85 |
|        | E5  | butyl pentanoate            | C9H18O2  | 158.23802 | 56,57,85 |
|        | E6  | heptyl methanoate           | C8H16O2  | 144.21    | 70,56,41 |
|        | E7  | hexyl methanoate            | C7H14O2  | 130.187   | 56       |
|        | E8  | octyl acetate               | C10H20O2 | 172.2646  | 43       |
|        | E9  | 3-methylbutyl octanoate     | C13H26O2 | 214.34434 | 70,127   |
|        | E10 | dodecyl acetate             | C14H28O2 | 228.37092 | 43,55    |
|        | E11 | decyl acetate               | C12H24O2 | 200.322   | 43,70    |
|        | E12 | ethyl acetate               | C4H8O2   | 88.10512  | 43       |
|        | E14 | isopentyl isobutyrate       | C9H18O2  | 158.23802 | 43,71    |
|        | E15 | ethyl oleate                | C20H38O2 | 310.51452 | 43       |
|        | E16 | 1-octen-3-ol butyrate       | C12H22O2 | 198.30188 | 43,54,71 |
| others | F1  | limonene                    | C10H16   | 136.23404 | 68,93    |
|        | F2  | 2-methylpyrazine            | C5H6N2   | 94.117    | 94,67    |
|        | F3  | 3-methylpyrazine            | C7H10N2  | 122.168   | 42,122   |
|        | F4  | 2-isopropyl pyrazine        | C7H10N2  | 122.171   | -        |

---
